# Supplementary material
Source: publisher figshare collection journal article supplement (https://gsapubs.figshare.com/articles/dataset/_/25087565)
Supplement: Supplementary file 7 [file 1]

# Tidal dissipation morphodynamic feedback triggers loss of microtidal marshes

Samuel M. Zapp<sup>1</sup> and Giulio Mariotti<sup>1,2</sup>

<sup>1</sup>Louisiana State University, Department of Oceanography and Coastal Sciences, Baton Rouge, LA, 70803, USA

<sup>2</sup>Louisiana State University, Center for Computation and Technology, Baton Rouge, LA, 70803, USA

## Supplemental Material

### 1. Previously explored hydro-morphodynamic feedbacks

This section summarizes previously studied feedbacks between hydrodynamics, morphodynamics, and intertidal vegetation development which can alter marsh trajectories. These feedbacks are similar to the long-term tidal dissipation feedback discussed in this paper, but are distinct phenomena which occur over different timescales and may overprint each other at a given location.

#### 1.1 Interactions between tidal range, tidal prism, and vertical accretion

Vertical accretion may reduce the tidal prism through a purely geometric effect, i.e., without changing the tidal characteristics. In landscape models which hold tidal range constant (Kirwan and Guntenspergen, 2010; D’Alpaos and Marani, 2016; Mariotti, 2020), intertidal vertical accretion simply subtracts from the tidal prism while the tidal range (the difference between high and low tidal level) is unchanged. A smaller tidal prism will result in shallower channels and transport less sediment in this case (Mariotti, 2020).

Tidal prism can also be affected by changes in tidal range. Marsh accretion tends to cause shoaling which increases the tidal range in strongly convergent estuaries with larger tidal ranges (Du et al., 2018; Cai et al., 2022). However, less convergent and longer estuaries with smaller tidal ranges experience a decreased tidal range with shallowing intertidal areas (Friedrichs and Madsen, 1992; Du et al., 2018; Payandeh et al., 2022). Modeling studies which explore this phenomenon often apply simplified formulations for sediment accretion to approximate morphodynamic development in intertidal marshes while neglecting subtidal/channel areas (Du et al., 2018; Alizad et al., 2022; Cai et al., 2022; Payandeh et al., 2022).

High fidelity hydro-morphodynamic models have considered feedbacks between tidal range and aggradation in both intertidal and subtidal areas. These feedbacks operate on small spatial (~1 km; Boechat Albernaz et al., 2023) and/or temporal (10-100 yrs; Zhang et al., 2018; Boechat Albernaz et al.,

2020) scales relative to the entire evolution of a marsh embayment or river delta, but generally confirm that shallowing water depths results in tidal dissipation rather than amplification especially in microtidal settings.

Physical experiments conducted in a scaled tidal embayment similarly show a reduction in tidal prism, and presumably tidal range, due to the emergence of vegetated intertidal areas in an open embayment transitioning to a partially filled estuary (Weisscher et al., 2022, 2023; Kleinhans et al., 2022). Generally, landward areas continued to aggrade relative to sea level throughout each experiment but relatively little aggradation ever occurred in landward reaches of the estuary. This suggests that frictional dissipation should limit the filling of an estuary or marsh over long timescales. The effects of long-term tidal dissipation across the transition from an open embayment to an extensive fully-filled marsh remain unconstrained.

### 1.2 Sediment starvation by vegetation

On a local scale ( $10^2$  m), the establishment of vegetation in shallow intertidal areas can have the effect of slowing flow velocities and promoting rapid sedimentation along the marsh edge. As a result, inorganic sediment concentration rapidly decreases moving from channels to the marsh interior. Inorganic accretion decays exponentially with distance in microtidal marshes and can become negligible less than  $10^2$  m into the marsh platform (Duran Vinent et al., 2021). The marsh interior then becomes more dependent on organic accretion and prone to ponding (Mariotti, 2020; Duran Vinent et al., 2021). In some cases, sediment starvation by vegetation may cause interior marshes several hundred meters from a large channel to collapse (Boechat Albernaz et al., 2023) or simply never form (Boechat Albernaz et al., 2020) if the channel network is unable to sufficiently respond and deliver sediment through the vegetation.

Vegetation establishment in seaward areas of long estuaries may also trap sediment locally and create a deficit in landward areas several kilometers away (Boechat Albernaz et al., 2020; Brückner et al., 2020). This can lead to the preferential maintenance of seaward marshes at the expense of forming landward marshes if sediment supply is limited.

### 1.3 Ebb dominance

Intertidal vegetation establishment and vertical accretion across an embayment can cause the tidal wave to propagate more slowly during low tide than during high tide (Friedrichs and Perry, 2001), causing a distortion of the tidal wave and eventually resulting in stronger currents during ebb than during flood. Ebb dominance may increase sediment export from landward areas and contribute to marsh loss (Boechat Albernaz et al., 2023). If marsh loss begins, ebb dominance may continue to increase (Donatelli et al., 2020) but it may also decrease (Finotello et al., 2023) depending on site specific basin geometry and ecology. Similarly, relative sea level rise may further enhance ebb dominance (Zhang et al., 2020; Jiang et al., 2020; Boechat Albernaz et al., 2023) or lead to flood dominance locally (Passeri et al., 2016; Wachler et al., 2020). Hence, despite being important in some cases, ebb dominance is by no means a universal mechanism to explain sediment export and marsh loss.

### 1.4 Vegetation mortality from hydrodynamic stressors

Vegetation mortality may be caused by increased hydroperiod (i.e. inundation stress) or erosion from increased flow velocity. Many eco-morphodynamic models implicitly account for inundation stress by

restricting vegetation growth to optimal elevations within the tidal frame (Kirwan and Guntenspergen, 2010; Alizad et al., 2016) and removing vegetation in impounded areas (Mariotti, 2020). Recently developed modules using Delft3D capture more detailed vegetation dynamics – including time dependent vegetation growth, colonization, hydraulic resistance, and mortality – across a landscape with coevolving hydrodynamics (Brückner et al., 2019). This coupling has revealed that reduced flow velocity from marsh establishment can increase the hydroperiod locally, causing mortality (Brückner et al., 2019). Mortality from erosion or local hydroperiod enhancement may expedite marsh collapse, and result in multi-decadal lags between initial stressors and rapid marsh loss, by removing vegetation from otherwise suitable elevations (Boechat Albernaz et al., 2023). Rapid devegetation of seaward marshes may also redistribute the tidal prism to overbank areas, resulting in both channel infilling and further inundation stress on the marsh (Temmerman et al., 2012).

## 2. Details of Modeling Approach

The domain is 22 by 4 km with a 20 m grid resolution. The furthest landward 5 km consists of a permanently inactive upland area bisected by a 200 m subaqueous channel (Fig. S1). This region is included only to allow tidal channels to cross the entire basin without being blocked by an impervious upland boundary, and it is excluded from the analyses presented here.

### 2.1 Temporally variable water level and wind inputs

Unique water level characteristics (tidal range, period, and sea level anomaly), wind speed, and wind direction are applied at each timestep. Tidal values are obtained by selecting random tidal cycles from a five-year time series (spanning 2007-2011) collected at a NOAA tide gauge located at Bishop's Head, MD. Wind values are taken from a nearby weather station. The data and justification for this procedure can be found in Mariotti & Zapp (2022). The primary aim of this approach is to reasonably capture natural short-term water level fluctuations in an idealized microtidal marsh, with the assumption that they can be applied over a longer timescale (3000 yrs in this case), rather than attempting to replicate a specific real-world field site. Variations in water level characteristics largely reflect the impacts of changing meteorologic conditions. Several studies have documented the outsized impacts of meteorologic conditions on sediment dynamics and vegetation growth in microtidal settings (Voss et al., 2013; Valentine and Mariotti, 2019; Zhu and Wiberg, 2022), so the inclusion of temporally variable forcings is deemed important. Mean tidal range and period are 0.54 m (microtidal) and 0.52 days (semidiurnal), respectively. Mean wind speed is 6.05 m/s. Mean sea level anomaly is imposed as a spatially uniform change in water level across the domain. Distributions of these variable inputs are displayed in Figure S2. It should be noted that the temporal variability of these boundary conditions is trendless due to the random selection of tidal cycles, so there is no change to long-term forcing conditions.

The upper limit of marsh vegetation growth is better described by high water levels than mean water levels (Goodwin and Mudd, 2019) because many species only require occasional inundation. We allow vegetation to grow up to an elevation equivalent to the 90<sup>th</sup> percentile high tide level (0.67/2 m RSL at seaward boundary) plus the 90<sup>th</sup> percentile positive MSL anomaly (0.19 m RSL) plus 0.1 m to account for precipitation. This upper bound has been demonstrated to better fit data from field experiments (Mariotti and Zapp, 2022) than the traditional mean high-water boundary (e.g. Morris et al., 2002). Otherwise, marsh accretion follows the same parabolic relationship with flooding depth implemented previously in the model (Mariotti, 2020).

## 2.2 Tidal dissipation due to friction

In addition to the temporal water level variability described in the previous section, tidal range is spatially variable in the along basin (x) direction due to frictional dissipation, but it is constant in the cross-basin direction (y). At each timestep, tidal level ( $\eta$ ) is governed by a nonlinear diffusion equation derived in Friedrichs & Madsen (1992) and expressed as:

$$\frac{\partial \eta}{\partial t} = \frac{1}{b\sqrt{|\partial \eta / \partial x|}} \frac{\partial}{\partial x} \left( \frac{\partial \eta}{\partial x} \int \frac{h^{5/3}}{n} dy \right)$$

where  $b$  is spatiotemporally variable inundated width (which controls the water storage), and  $h$  is water depth (m) for a given time in the tidal cycle, and  $n$  is Manning's roughness coefficient (variable depending on the presence or absence of vegetation). Multiple tidal cycles are passed through this routine with several timesteps per cycle, so here  $dt$  corresponds to a timescale of minutes to hours, rather than the 0.2 yr morphodynamic timestep present in the rest of the model. The unique diffusion coefficient is assigned to each value in the  $x$  direction and corresponds to cross-sectionally averaged (in the  $y$  direction) transmissivity of the embayment with respect to the tidal prism. Both  $h$  and  $n$  may vary across a given transect, so they are integrated in the  $y$  direction. The difference between the largest and smallest values of  $\eta$  over a simulated tidal cycle are assigned as the local tidal range across the morphodynamic timestep. As such, tidal range only varies in the  $x$  direction and is held constant in the  $y$  direction at a given timestep. This procedure has already been implemented numerically in (Zapp and Mariotti, 2023). The tidal dissipation routine is applied twice at each timestep: once using the unique water level inputs for that step, and once using 90<sup>th</sup> percentile water level values. The 90<sup>th</sup> percentile values are used to calculate the upper limit for vegetation growth as described in Section 2.1.

## 2.3 Model Limitations

Tidal amplification is not possible with the tidal dissipation routine. The model also inherently assumes that bottom friction is dominant over local and advective acceleration, which is the case for the interior of marsh-filled estuaries but not for all estuaries (Friedrichs and Madsen, 1992). For these reasons, we chose an initial embayment geometry which would be classified as a convergent, strongly dissipative estuary according to the classification scheme of (Lanzoni and Seminara, 1998). Tidal amplification would not occur in such a setting, and friction becomes more dominant as the embayment fills, so the tidal dissipation routine is appropriately applied to all basin configurations present in this simulation. If anything, tidal prism conveyance may be underestimated for the first several hundred years.

The hydrodynamics of this model also neglect tidal asymmetry, which has been demonstrated to influence morphodynamic feedbacks over multidecadal timescales in an idealized mesotidal marsh (Boechat Albernaz et al., 2023). The development of ebb-dominance as intertidal area increases during basin filling could lead to sediment export due to increased seaward directed tidal current velocities (Boechat Albernaz et al., 2023). However, this mechanism appears to be relatively less important than tidal dissipation for large embayments with very small tidal ranges. Although peak ebb velocities (1.1 m/s) are slightly larger than peak flood velocities (1.0 m/s) at Blackwater NWR, sediment export is primarily driven by spatial gradients in sediment resuspension (Ganju et al., 2013). Sediment resuspension, both at Blackwater NWR and in the simulation presented here, is strongly controlled by wind waves in landward open water areas, which have developed over decades to centuries under a restricted tidal range. This result also agrees with previous theoretical analysis (Gatto et al., 2017),

indicating that tidal asymmetry (e.g., ebb dominance) is fundamental for the transport of sand but it is less so for the transport of mud, which is instead dominated by spatial advective lags, i.e., those simulated in our model.

### 3. Impact of vegetation on morphodynamic development

The presence of vegetation in the model is essential for a relatively stable platform of elevations above MSL to become established across the domain. When vegetative processes are turned off and an otherwise identical simulation to that presented in Figure 2 is performed, the platform never fully fills in landward areas and begins to submerge before migrating seaward (Fig. S3). This result is analogous to simulations performed with other models, showing that vegetation helps to retain sediment (D'Alpaos and Marani, 2016). However, this finding is in contrast with a recent study considering a smaller platform with a larger tidal range (Boechat Albernaz et al., 2023). That study demonstrates that the presence of vegetation decreases a system's ability to import and retain sediments due to a decrease in tidal prism (not necessarily tidal range) and the development of ebb-dominance. Here, the microtidal marsh relies more heavily on organic accretion, and the development of wind waves over large interior ponds provides a greater stress in the form of edge erosion. Therefore, the impacts of vegetation on overall marsh trajectory appear to depend on site-specific conditions. For example, the same model used here showed that tidal range attenuation was minimal for a mesotidal case even for a long (20 km) marsh domain (Zapp and Mariotti, 2023).

Although the presence of vegetation is essential to shaping the trajectory of the embayment considered in this study, the frictional effect of marshes has very little direct contribution to the degree of tidal dissipation across the basin. Tidal dissipation is linearly dependent on the Manning coefficient which varies by less than an order of magnitude between vegetated and unvegetated cells, but it is exponentially dependent on water depth which may locally change by two orders of magnitude (see equation in supplemental section 2.2). When tidal range outputs from the simulation presented in Figure 2J-K are recalculated with a spatially uniform Manning coefficient set to the lower unvegetated value, there is very little impact on tidal range at every location and time (Fig. S4). Tidal range is marginally lower but never changes by more than 2% locally when the enhanced frictional effect of vegetation is included in the tidal dissipation routine. Essentially, the presence of very small water depths, which are extremely common in marshes, have a larger frictional impact on tidal conveyance than the direct frictional enhancement due to vegetation.

### 4. Unvegetated-Vegetated Ratio (UVVR) calculation

UVVR is the ratio of unvegetated area (water, bare land) to vegetated area within a salt marsh. For both the historical imagery at Blackwater NWR and the model simulation, non-intertidal upland areas, as well as offshore subtidal areas (e.g. Fishing Bay) are excluded from the analysis. Vegetation extent in 1938 was manually delineated using georeferenced aerial data (Scott et al., 2009). Modern vegetation extent was obtained from publicly available 2020 NDVI-based classification by the U.S. Fish & Wildlife service. The Blackwater UVVR values in Figure 3 (0.32 and 0.92 for 1938 and 2020 respectively) were calculated over an aerial extent of the same dimensions as the simulation (17 km x 4 km) spanning from Fishing Bay to approximately the location of Golden Hill Rd, Cambridge, MD on the landward side of the largest modern pond.

### 5. Numerical Simulation Scenarios

In addition to the simulation presented in Figure 2 (with tidal range dissipation, RSLR = 1.5 mm/yr, and  $C_0 = 55$  mg/l), we ran an otherwise identical simulation without tidal dissipation which exhibits no marsh loss (Figs. 3, S5). When RSLR is instantaneously accelerated from 1.5 to 4 mm/yr, rapid landward marsh collapse occurs within 300 yrs only if tidal dissipation is present (Figs. 3, S7). System-wide UVVR is impacted by less than 0.01 throughout the simulation if RSLR is gradually increased over a 50 yr period rather than being instantaneously increased.

When sediment supply is decreased by 55% (from 55 mg/l to 25 mg/l at seaward boundary), total marsh area temporarily increases if tidal dissipation is present (Fig. S6). This is because the seaward facing mudflat and tidal channel are both able to deepen and more efficiently convey the tide, lessening the tidal choking effect (Fig. S8). To the extent that land loss does occur under decreased sediment supply, it is primarily focused around the seaward marsh edge rather than the landward ponds.

## Figure Captions

**Figure S1.** The full simulation showing the initialized topography. Inactive upland areas flanking a narrow channel are present in a 5 km long upland region, but not included in the analyses presented here. The marsh can establish within a 60 km<sup>2</sup> region which initially consists of uplands, intertidal, and subtidal areas. A 2 km long permanent mudflat covers the most seaward portion of the domain.

**Figure S2.** Distributions of the time-variable water level and wind inputs described in S 1.2. Water level inputs are relatively normally distributed, but span a wide range. The most common wind direction is approximately 45° counterclockwise from the seaward direction, or from Northwest to Southeast.

**Figure S3.** Embayment morphology through time for a simulation with no vegetation that is otherwise identical to the simulation presented in Figure 2. (A-G) Morphology every 500 yrs. (H) Area that would be classified as marsh if it were present. (I) UVVR. (J) Tidal range at  $x = 10$  km. (K) Spatial gradient in tidal range every 1000 yrs.

**Figure S4.** Percent change in tidal range through space and time compared to simulation presented in Figure 2 if frictional effect of vegetation on tidal dissipation is neglected. Vegetation only marginally decreases the tidal range.

**Figure S5.** Embayment morphology through time for the spatially constant tidal range simulation plotted in Fig. 3.

**Figure S6.** Comparison of Unvegetated-Vegetated Ratio (UVVR; A) and total marsh area (B) through time for tidal dissipation simulation (Fig. 2) and an otherwise identical simulation with a spatially uniform tidal range (see Fig. S5). Scenarios with decreased sediment supply (from 55 mg/l to 25 mg/l) starting at  $t = 1200, 1400,$  and  $1600$  yrs and spanning 300 yrs are also displayed for both cases (dashed lines). Change in UVVR from 1938-2020 at Blackwater NWR is displayed as a green arrow starting at an arbitrary time.

**Figure S7.** Embayment morphology from  $t = 1200 - 1500$  yrs for simulation with Relative Sea Level Rise (RSLR) rate held constant at 1.5 mm/yr (i.e. Fig. 2 simulation) and for simulation where RSLR rate is increased to 4 mm/yr over that time period (see Fig. 3).

**Figure S8.** Embayment morphology from  $t = 1200 - 1500$  yrs for simulation with suspended sediment supply ( $C_o$ ) held constant at 55 mg/l (i.e. Fig. 2 simulation) and for simulation where  $C_o$  is dropped to 25 mg/l over that time period (see Fig. S6).

## References

- Alizad, K., Hagen, S.C., Morris, J.T., Bacopoulos, P., Bilskie, M.V., Weishampel, J.F., and Medeiros, S.C., 2016, A coupled, two-dimensional hydrodynamic-marsh model with biological feedback: Ecological Modelling, v. 327, p. 29–43, doi:10.1016/j.ecolmodel.2016.01.013.
- Alizad, K., Morris, J.T., Bilskie, M.V., Passeri, D.L., and Hagen, S.C., 2022, Integrated Modeling of Dynamic Marsh Feedbacks and Evolution Under Sea-Level Rise in a Mesotidal Estuary (Plum Island, MA, USA): Water Resources Research, v. 58, p. e2022WR032225, doi:10.1029/2022WR032225.
- Boechat Albernaz, M., Brückner, M.Z.M., van Maanen, B., van der Spek, A.J.F., and Kleinhans, M.G., 2023, Vegetation Reconfigures Barrier Coasts and Affects Tidal Basin Infilling Under Sea Level Rise: Journal of Geophysical Research: Earth Surface, v. 128, p. e2022JF006703, doi:10.1029/2022JF006703.
- Boechat Albernaz, M., Roelofs, L., Pierik, H.J., and Kleinhans, M.G., 2020, Natural levee evolution in vegetated fluvial-tidal environments: Earth Surface Processes and Landforms, v. 45, p. 3824–3841, doi:10.1002/esp.5003.
- Brückner, M.Z.M., Braat, L., Schwarz, C., and Kleinhans, M.G., 2020, What Came First, Mud or Biostabilizers? Elucidating Interacting Effects in a Coupled Model of Mud, Saltmarsh, Microphytobenthos, and Estuarine Morphology: Water Resources Research, v. 56, p. e2019WR026945, doi:10.1029/2019WR026945.
- Brückner, M.Z.M., Schwarz, C., van Dijk, W.M., van Oorschot, M., Douma, H., and Kleinhans, M.G., 2019, Salt Marsh Establishment and Eco-Engineering Effects in Dynamic Estuaries Determined by Species Growth and Mortality: Journal of Geophysical Research: Earth Surface, v. 124, p. 2962–2986, doi:10.1029/2019JF005092.
- Cai, X., Qin, Q., Shen, J., and Zhang, Y.J., 2022, Bifurcate responses of tidal range to sea-level rise in estuaries with marsh evolution: Limnology and Oceanography Letters, v. 7, doi:10.1002/lol2.10256.
- D’Alpaos, A., and Marani, M., 2016, Reading the signatures of biologic–geomorphic feedbacks in salt-marsh landscapes: Advances in Water Resources, v. 93, p. 265–275, doi:10.1016/j.advwatres.2015.09.004.
- Donatelli, C., Zhang, X., Ganju, N.K., Aretxabaleta, A.L., Fagherazzi, S., and Leonardi, N., 2020, A nonlinear relationship between marsh size and sediment trapping capacity compromises salt marshes’ stability: Geology, v. 48, p. 966–970, doi:10.1130/G47131.1.
- Du, J., Shen, J., Zhang, Y.J., Ye, F., Liu, Z., Wang, Z., Wang, Y.P., Yu, X., Sisson, M., and Wang, H.V., 2018, Tidal Response to Sea-Level Rise in Different Types of Estuaries: The Importance of Length, Bathymetry, and Geometry: Geophysical Research Letters, v. 45, p. 227–235, doi:10.1002/2017GL075963.

270 Duran Vincent, O., Herbert, E.R., Coleman, D.J., Himmelstein, J.D., and Kirwan, M.L., 2021, Onset of  
 271 runaway fragmentation of salt marshes: *One Earth*, v. 4, p. 506–516,  
 272 doi:10.1016/j.oneear.2021.02.013.

273 Finotello, A., Tognin, D., Carniello, L., Ghinassi, M., Bertuzzo, E., and D’Alpaos, A., 2023, Hydrodynamic  
 274 Feedbacks of Salt-Marsh Loss in the Shallow Microtidal Back-Barrier Lagoon of Venice (Italy):  
 275 *Water Resources Research*, v. 59, p. e2022WR032881, doi:10.1029/2022WR032881.

276 Friedrichs, C.T., and Madsen, O.S., 1992, Nonlinear Diffusion of the Tidal Signal in Frictionally Dominated  
 277 Embayments: *Journal of Geophysical Research*, v. 97, p. 5637–5650.

278 Friedrichs, C.T., and Perry, J.E., 2001, Tidal Salt Marsh Morphodynamics: A Synthesis: *Journal of Coastal*  
 279 *Research*, p. 7–37.

280 Ganju, N.K., Nidzieko, N.J., and Kirwan, M.L., 2013, Inferring tidal wetland stability from channel  
 281 sediment fluxes: Observations and a conceptual model: *Journal of Geophysical Research: Earth*  
 282 *Surface*, v. 118, p. 2045–2058, doi:https://doi.org/10.1002/jgrf.20143.

283 Gatto, V.M., van Prooijen, B.C., and Wang, Z.B., 2017, Net sediment transport in tidal basins: quantifying  
 284 the tidal barotropic mechanisms in a unified framework: *Ocean Dynamics*, v. 67, p. 1385–1406,  
 285 doi:10.1007/s10236-017-1099-3.

286 Goodwin, G.C.H., and Mudd, S.M., 2019, High Platform Elevations Highlight the Role of Storms and  
 287 Spring Tides in Salt Marsh Evolution: *Frontiers in Environmental Science*, v. 7,  
 288 <https://www.frontiersin.org/article/10.3389/fenvs.2019.00062> (accessed June 2022).

289 Jiang, L., Gerkema, T., Idier, D., Slangen, A.B.A., and Soetaert, K., 2020, Effects of sea-level rise on tides  
 290 and sediment dynamics in a Dutch tidal bay: *Ocean Science*, v. 16, p. 307–321, doi:10.5194/os-  
 291 16-307-2020.

292 Kirwan, M.L., and Guntenspergen, G.R., 2010, Influence of tidal range on the stability of coastal  
 293 marshland: *Journal of Geophysical Research: Earth Surface*, v. 115, doi:10.1029/2009JF001400.

294 Kleinhans, M.G., Roelofs, L., Weisscher, S.A.H., Lokhorst, I.R., and Braat, L., 2022, Estuarine  
 295 morphodynamics and development modified by floodplain formation: *Earth Surface Dynamics*,  
 296 v. 10, p. 367–381, doi:10.5194/esurf-10-367-2022.

297 Lanzoni, S., and Seminara, G., 1998, On tide propagation in convergent estuaries: *Journal of Geophysical*  
 298 *Research: Oceans*, v. 103, p. 30793–30812, doi:10.1029/1998JC900015.

299 Mariotti, G., 2020, Beyond marsh drowning: The many faces of marsh loss (and gain): *Advances in Water*  
 300 *Resources*, v. 144, p. 103710, doi:10.1016/j.advwatres.2020.103710.

301 Mariotti, G., and Zapp, S.M., 2022, A Framework to Simplify Astro-Meteorological Water Level and Wind  
 302 Inputs for Modeling Coastal Marsh Ecomorphodynamics: *Journal of Geophysical Research: Earth*  
 303 *Surface*, v. 127, p. e2022JF006665, doi:10.1029/2022JF006665.



304 Morris, J.T., Sundareshwar, P.V., Nietch, C.T., Kjerfve, B., and Cahoon, D.R., 2002, Responses of Coastal  
305 Wetlands to Rising Sea Level: Ecology, v. 83, p. 2869–2877, doi:[https://doi.org/10.1890/0012-9658\(2002\)083\[2869:ROCWTR\]2.0.CO;2](https://doi.org/10.1890/0012-9658(2002)083[2869:ROCWTR]2.0.CO;2).  
306

307 Passeri, D.L., Hagen, S.C., Plant, N.G., Bilskie, M.V., Medeiros, S.C., and Alizad, K., 2016, Tidal  
308 hydrodynamics under future sea level rise and coastal morphology in the Northern Gulf of  
309 Mexico: Earth’s Future, v. 4, p. 159–176, doi:10.1002/2015EF000332.

310 Payandeh, A.R., Justic, D., Huang, H., Mariotti, G., and Hagen, S.C., 2022, Tidal change in response to the  
311 relative sea level rise and marsh accretion in a tidally choked estuary: Continental Shelf  
312 Research, v. 234, p. 104642.

313 Temmerman, S., Moonen, P., Schoelynck, J., Govers, G., and Bouma, T.J., 2012, Impact of vegetation die-  
314 off on spatial flow patterns over a tidal marsh: Geophysical Research Letters, v. 39,  
315 doi:10.1029/2011GL050502.

316 Valentine, K., and Mariotti, G., 2019, Wind-driven water level fluctuations drive marsh edge erosion  
317 variability in microtidal coastal bays: Continental Shelf Research, v. 176, p. 76–89,  
318 doi:10.1016/j.csr.2019.03.002.

319 Voss, C.M., Christian, R.R., and Morris, J.T., 2013, Marsh macrophyte responses to inundation anticipate  
320 impacts of sea-level rise and indicate ongoing drowning of North Carolina marshes: Marine  
321 Biology, v. 160, p. 181–194, doi:10.1007/s00227-012-2076-5.

322 Wachler, B., Seiffert, R., Rasquin, C., and Kösters, F., 2020, Tidal response to sea level rise and  
323 bathymetric changes in the German Wadden Sea: Ocean Dynamics, v. 70, p. 1033–1052,  
324 doi:10.1007/s10236-020-01383-3.

325 Weisscher, S.A.H., Adema, P.H., Rossius, J.-E., and Kleinhans, M.G., 2023, The effect of sea-level rise on  
326 estuary filling in scaled landscape experiments: The Depositional Record, v. 9, p. 363–379,  
327 doi:10.1002/dep2.233.

328 Weisscher, S. a. H., Van den Hoven, K., Pierik, H.J., and Kleinhans, M.G., 2022, Building and Raising Land:  
329 Mud and Vegetation Effects in Infilling Estuaries: Journal of Geophysical Research: Earth Surface,  
330 v. 127, p. e2021JF006298, doi:10.1029/2021JF006298.

331 Zapp, S.M., and Mariotti, G., 2023, Frictional dissipation of tidal signal exerts a significant influence on  
332 the morphological development of elongate microtidal marsh platforms, *in* Coastal Sediments  
333 2023, WORLD SCIENTIFIC, p. 1477–1487, doi:10.1142/9789811275135\_0137.

334 Zhang, X., Fagherazzi, S., Leonardi, N., and Li, J., 2018, A Positive Feedback Between Sediment  
335 Deposition and Tidal Prism May Affect the Morphodynamic Evolution of Tidal Deltas: Journal of  
336 Geophysical Research: Earth Surface, v. 123, p. 2767–2783, doi:10.1029/2018JF004639.

337 Zhang, X., Leonardi, N., Donatelli, C., and Fagherazzi, S., 2020, Divergence of Sediment Fluxes Triggered  
338 by Sea-Level Rise Will Reshape Coastal Bays: Geophysical Research Letters, v. 47, p.  
339 e2020GL087862, doi:10.1029/2020GL087862.

340 Zhu, Q., and Wiberg, P.L., 2022, The Importance of Storm Surge for Sediment Delivery to Microtidal  
341 Marshes: *Journal of Geophysical Research: Earth Surface*, v. 127, p. e2022JF006612,  
342 doi:10.1029/2022JF006612.

343

344
