# Supplementary material
Source: publisher figshare collection journal article supplement (https://gsapubs.figshare.com/articles/dataset/_/25087565)

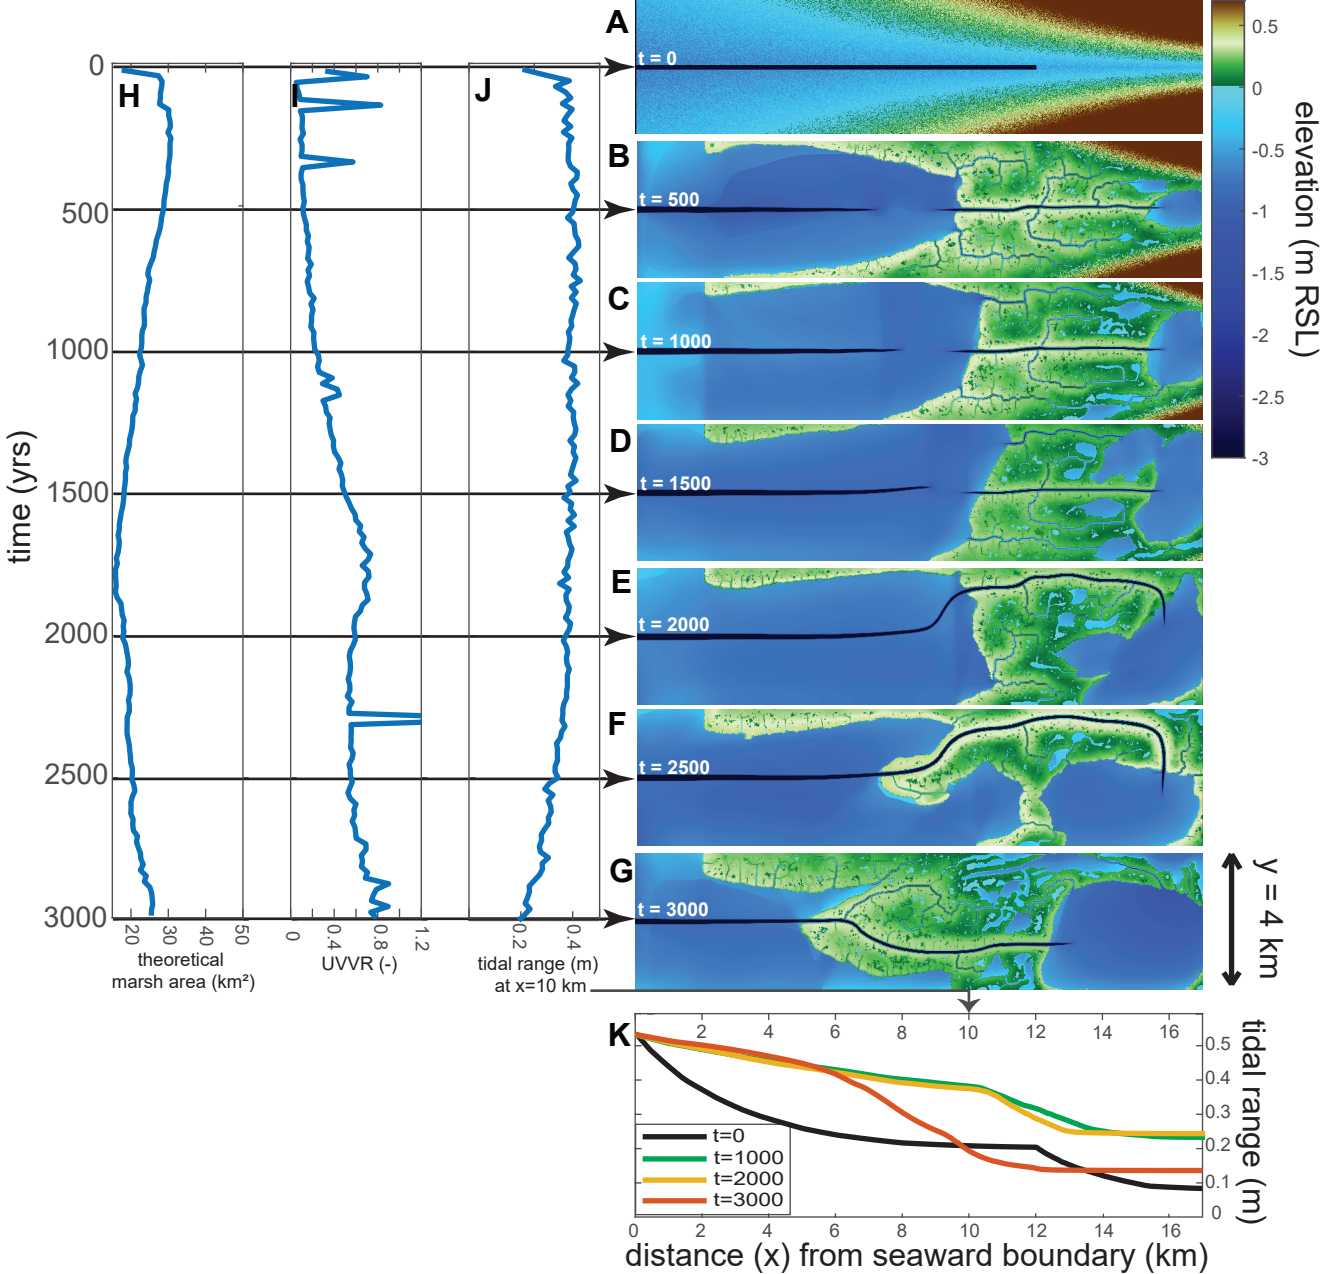

Supplement: Supplementary file 1 [file 1]

t = 1200 yrs

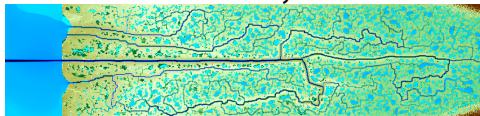

Co = 55 mg/l

t = 1300 yrs

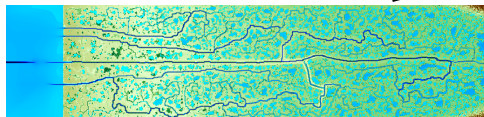

Co = 25 mg/l

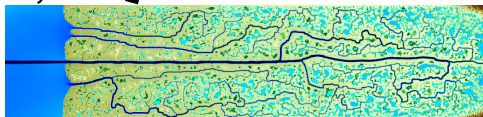

t = 1400 yrs

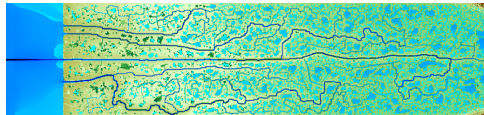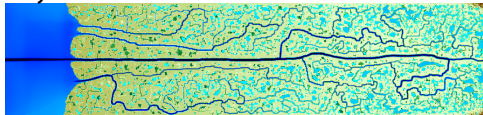

t = 1500 yrs

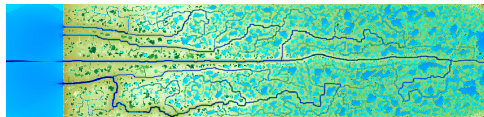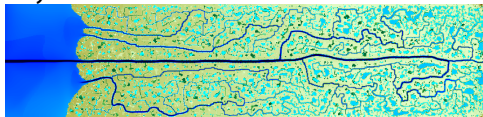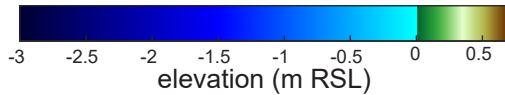

Supplement: Supplementary file 2 [file 1]

Seaward Boundary

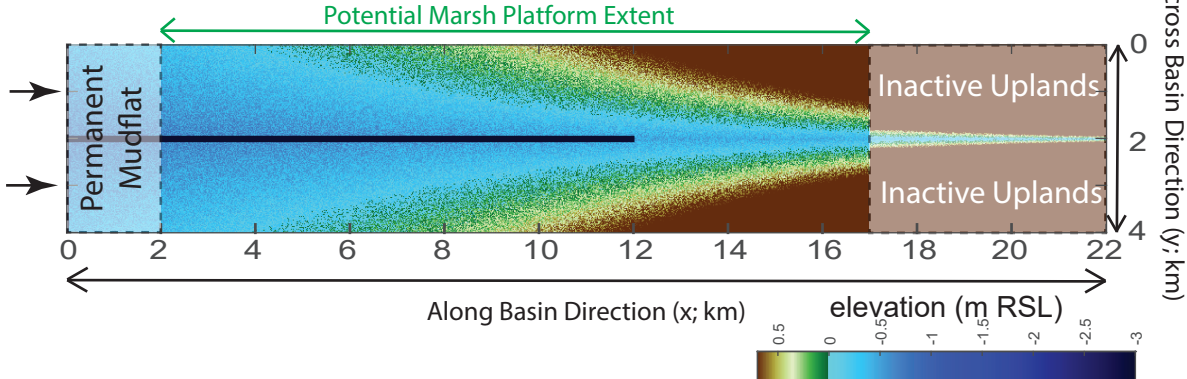

Supplement: Supplementary file 3 [file 1]

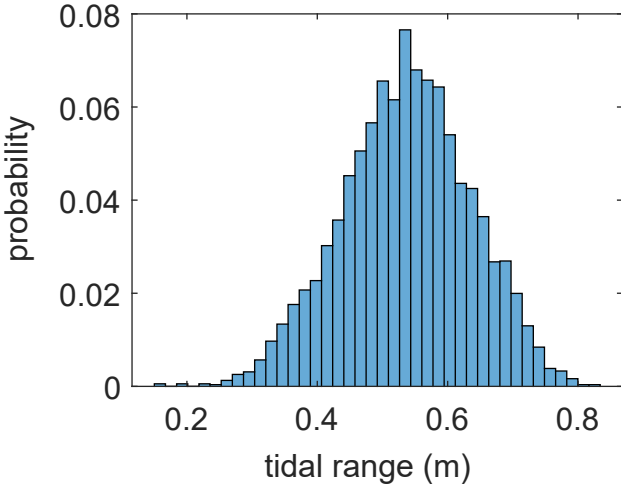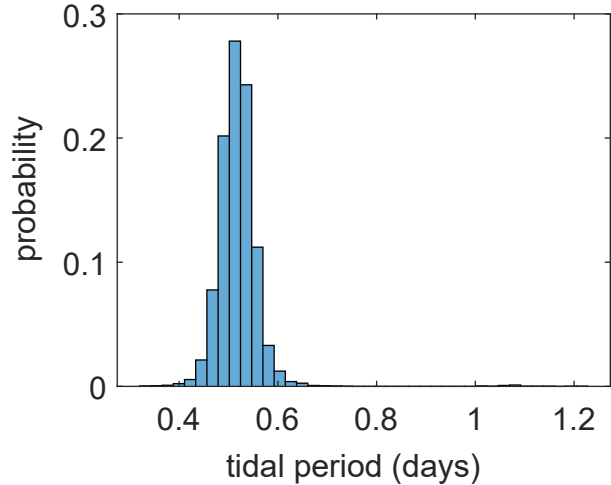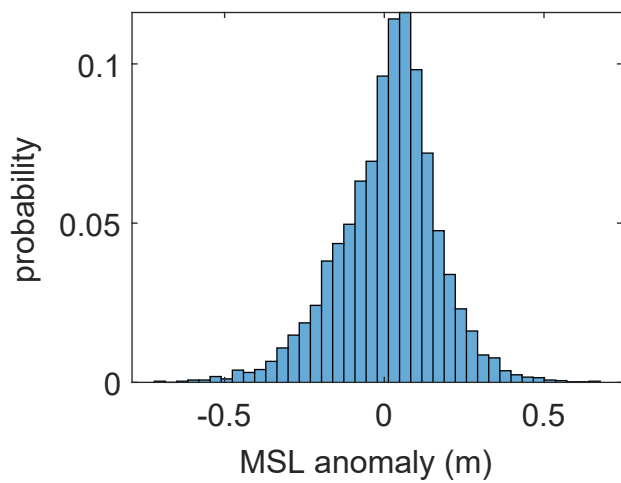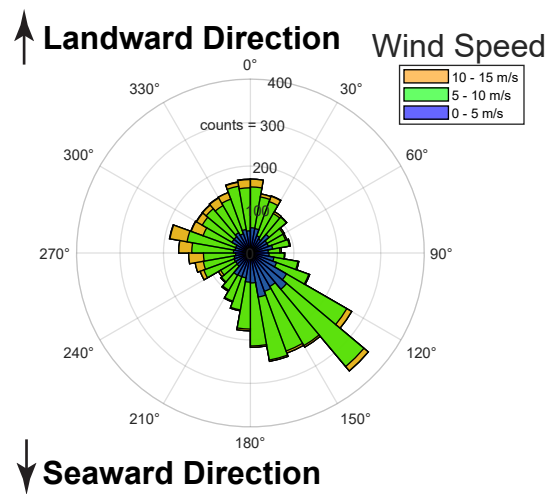

Supplement: Supplementary file 4 [file 1]

# Simulations with Decreased Sediment Supply Scenarios

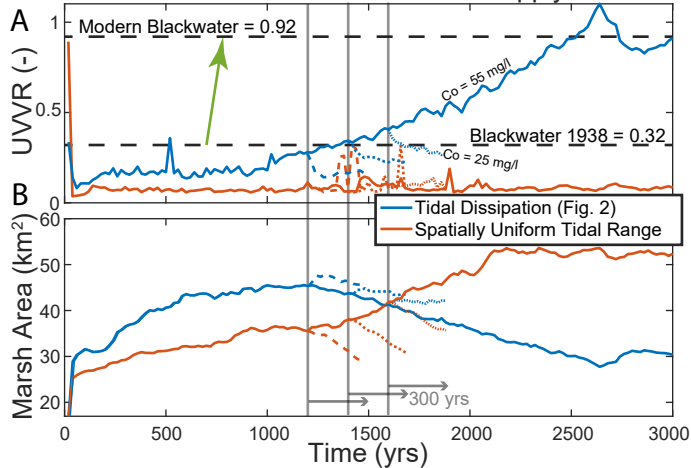

Supplement: Supplementary file 5 [file 1]

$t = 1200 \text{ yrs}$

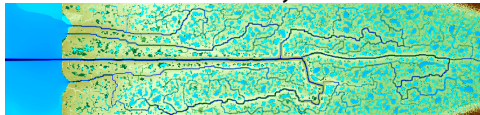

RSLR = 1.5 mm/yr

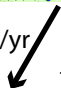

$t = 1300 \text{ yrs}$

RSLR = 4 mm/yr

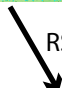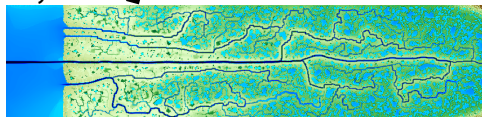

$t = 1400 \text{ yrs}$

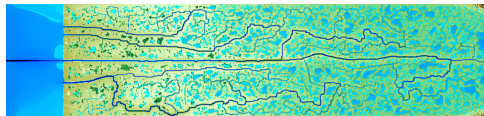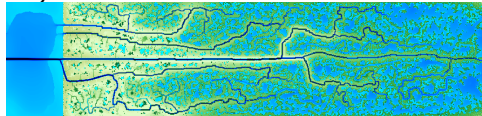

$t = 1500 \text{ yrs}$

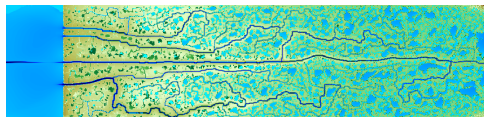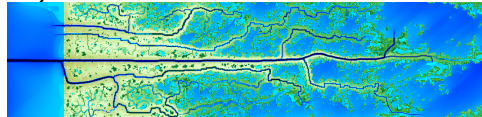

Supplement: Supplementary file 6 [file 1]

# Effect of Vegetation Roughness on Tidal Dissipation

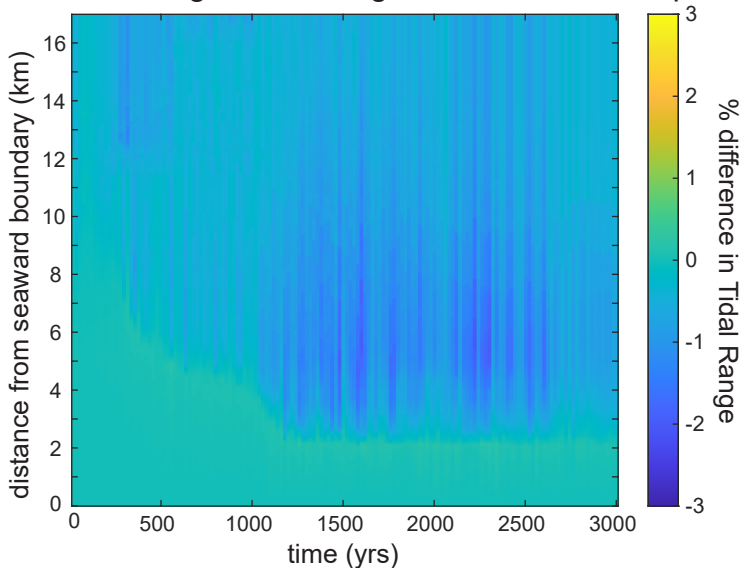

Supplement: Supplementary file 8 [file 1]

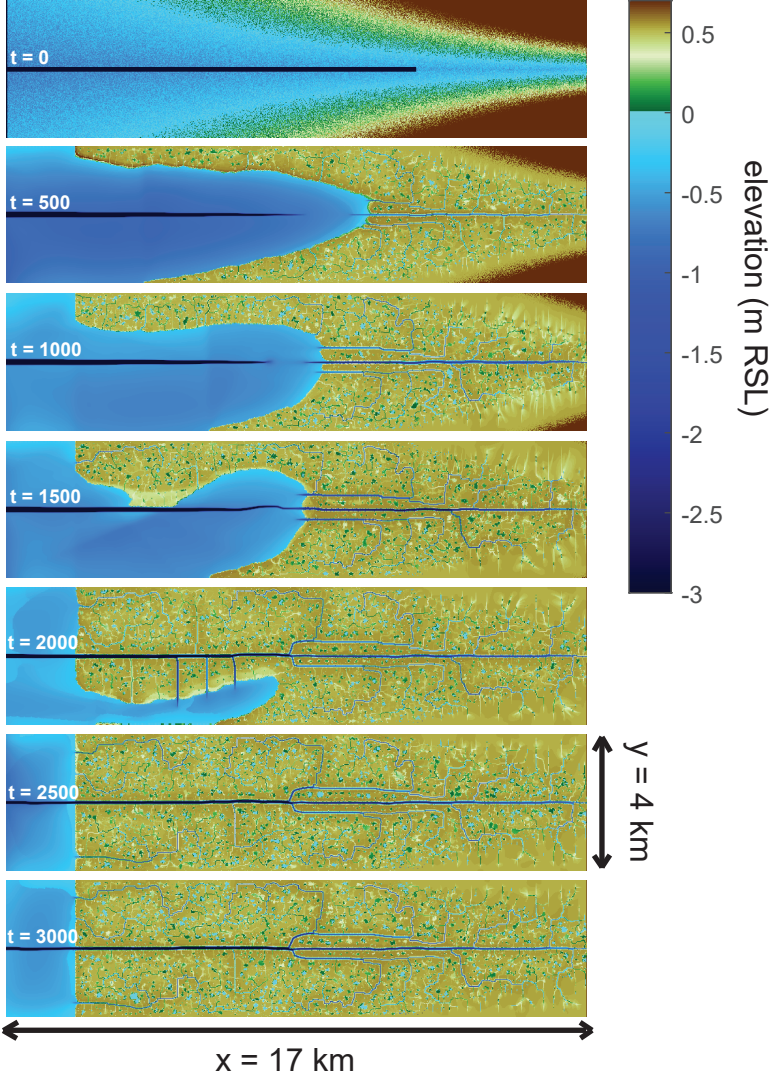

Supplement: Supplementary file 9 [file 1]
